# Supplementary material for: A Novel Protein Isoform of the Multicopy Human NAIP Gene Derives from Intragenic Alu SINE Promoters
Source: PLoS One. 2009 Jun 2;4(6):e5761. doi: 10.1371/journal.pone.0005761 (PMC2685007; doi:10.1371/journal.pone.0005761)
Supplement: Table S1 — Primers used in this report. A list of all primers used throughout this investigation is sectioned according to the general application for which they were designed. Associated with each primer is the sequence, the Tm at which it was utilized, as well as a note specifying its particular application. (0.07 MB XLS) [file pone.0005761.s007.xls]

## Sheet: Sheet1
Supplementary Table 1. Primers used in this report
RT-PCR
Primer Name	Primer Sequence	Tm (°C)	Application
NAIPe-F (Ex1)	5' cctctattagactagaactgtgg 3'	58	NAIP 5' vs 3' analysis
NAIPf-R (Ex2)	5' ctgtggtatccatgagctgtac 3'	58	NAIP 5' vs 3' analysis
NAIPEx10(outer)-F	5' gaatctcttgaagtctcagg 3'	58	NAIP 5' vs 3' analysis
NAIPEx12-R	5' caagcatagtcatgagagacc 3'	58	NAIP 5' vs 3' analysis
NAIPAluSg-F	5' gagtcttgctctgtctcctag 3'	58	Spatial expression panel
NAIPAluJb-F	5' tttgcctggcctctttcctg 3'	58	Spatial expression panel
NAIPGUSBP1-F	5' aagtgttaaagcgactcagcag 3'	57	Spatial expression panel
NAIPEx10-R2	5' ggcgctggtataagctgctc 3'	57/58	Spatial expression panel
NAIPAluJb-R	5' ttggcacaaaatcggaatgtgg 3'	58	Spatial expression panel
NAIP5'a-F	5' ccttctaggatatctggattgc 3'	57	Tiled primer analysis of NAIPfulll TSS
NAIP5'b-F	5' tgtatggcagcacaacatcagg 3'	57	Tiled primer analysis of NAIPfulll TSS
NAIPa-F	5' agtgtatgacagtgagctaactg 3'	57	Tiled primer analysis of NAIPfulll TSS
NAIPh-F	5' aatcatgcctaagtgatggcac 3'	57	Tiled primer analysis of NAIPfulll TSS
NAIPb-F	5' ctcttcgactgcctgttcatc 3'	57	Tiled primer analysis of NAIPfulll TSS
NAIPERV_P-F	5' gtgaactcagacagaagtgtgg 3'	57	Tiled primer analysis of NAIPfulll TSS
NAIPEx2-R	5' actggggatcctctcgtcag 3'	57	Tiled primer analysis of NAIPfulll TSS
NAIPAluSg-F	5' gagtcttgctctgtctcctag 3'	65	Full-length transcription from NAIPSg
NAIPAluJb-F	5' tttgcctggcctctttcctg 3'	70	Full-length transcription from NAIPJb
NAIP3'-R	5' tcggagacaatgaagctgctg 3'	65/70	Full-length transcription from NAIPSg & Jb
h/m beta-actin-F	5' tccatcatgaagtgtgacg 3'	56	actin
h/m beta-actin-R	5' gcgcaagttaggttttgtcaa 3'	56	actin
5' RACE
Primer Name	Primer Sequence	Tm (°C)	Application
NAIPEx10-R2	5' ggcgctggtataagctgctc 3'	55-60	Revised 5' RACE nested primers
NAIPEx10-R	5' agatcacagcccagcaagtgg 3'	55-60	Revised 5' RACE nested primers
NAIPEx2(outer)-R	5' ctgtggtatccatgagctgtac 3'	55	Initial 5' RACE nested primers
NAIPEx2(inner)-R	5' actgggagatcctctcgtcag 3'	55	Initial 5' RACE nested primers
qRT-PCR
Primer Name	Primer Sequence	Tm (°C)	Application
qNAIPEx1-F	5' gcattctcctctattagactag 3'		Discrmination of NAIPfull transcription
qNAIPEx2-R	5' gccaactgaactgcatctag 3'		Discrmination of NAIPfull transcription
qNAIPERV_P-F2	5' tgctgtctgtggagaattggag 3'		Discrmination of NAIPERV-P transcription
qNAIPERV_P-R4	5' tatttaaggaacttgttgcccag 3'		Discrmination of NAIPERV-P transcription
qNAIPAluSg-F3(cDNA)	5' tagctgggattgcagttgtcc 3'		Discrmination of edited NAIPSg transcription
qNAIPAluSg-F4(cDNA)	5' tagctgggattgcagaaatgg 3'		Discrmination of edited NAIPSg transcription
qNAIPAluSg-F3(gDNA)	5' agtagctaggattacagttgtcc 3'		Discrmination of unedited NAIPSg transcription
qNAIPAluSg-F4(gDNA)	5' gagtagctaggattacagaaatgg 3'		Discrmination of unedited NAIPSg transcription
qNAIPEx9-R(o)	5' ctctgaaggtctggagtcac 3'		Discrmination of NAIPSg transcription
qNAIPEx10-R2	5' ggcgctggtataagctgctc 3'		Discrmination of NAIPSg transcription
qNAIPAluJb-F	5' tttgcctggcctctttcctg 3'		Discrmination of NAIPJb transcription
qNAIPAluJb-R(i)	5' catgtgtccaaagtgccacac 3'		Discrmination of NAIPJb transcription
qNAIPEx10-F	5' acaggaactgcttctcacc 3'		Discrmination of total NAIP transcription
qNAIPEx11-R	5' tatattgccctccagatccac 3'		Discrmination of total NAIP transcription
qbeta-actin-F	5' aaggagatcactgccctggc 3'		Discrmination of beta-actin transcription
qbeta-actin-R	5' ccacatctgctggaaggtgg 3'		Discrmination of beta-actin transcription
REPORTER CONSTRUCTS
Primer Name	Primer Sequence	Tm (°C)	Application
gNAIP ERV_P-F	5' agctcttaagcctttaggatatctggattgc 3'	66	amplification of LTR promoter fragment
gNAIP-ERV_P-R	5' agctaagcttggaaaaaccatttctctactcac 3'	66	amplification of LTR promoter fragment
gNAIP non-LTR-F	5' agctagatctcaaactagaataaaggccggatg 3'	66	amplification of non-LTR promoter fragment
gNAIP non-LTR-R	5' agctagatctaagacaaagaagggaccatagg 3'	66	amplification of non-LTR promoter fragment
gNAIP AluSg-F	5' atcttaaggggtcaaaaaaatatataacac 3'	60	amplification of AluSg promoter fragment
gNAIP AluSg-R	5' ataagcttaaaatgtgaaagggaccag 3'	60	amplification of AluSg promoter fragment
gNAIP AluJb-F	5' atcttaaggggaccacaagcatgtgc 3'	60	amplification of AluJb promoter fragment
gNAIP AluJb-R	5' ataagcttctggcgctggtataagctg 3'	60	amplification of AluJb promoter fragment
EXPRESSION VECTOR
Primer Name	Primer Sequence	Tm (°C)	Application
NAIP-F(C-term epi)	5' agctagctcgagatggcacagggtgaagccc 3'	58	amplification of NAIPAlu ORF
NAIP(691)-F [Ex10]	5' acctagagaccattctagag 3'	N/A	sequencing of ORF
NAIP(1417)-F [Ex10]	5' cagccagaaatttcactgcag 3'	N/A	sequencing of ORF
NAIP(2100)-F [Ex10]	5' acaggaactgcttctcacc 3'	N/A	sequencing of ORF
NAIP(2700)-F [Ex13]	5' cttcattgtctccgagtcctc 3'	N/A	sequencing of ORF
NAIP-R(C-term epi)	5' agctagccatggttttctgaatgattggagag 3'	58	amplification of NAIPAlu ORF
NAIP(2450)-R [Ex12]	5' caagcatagtcatgagagacc 3'	N/A	sequencing of ORF
NAIP(1778)-R [Ex10]	5' aaggcagaagcatagtcctg 3'	N/A	sequencing of ORF
NAIP(1010)-R [Ex10]	5' ttcaaggccagctcaccac 3'	N/A	sequencing of ORF
NAIP(250)-R [Ex10]	5' agatcacagcccagcaagtgg 3'	N/A	sequencing of ORF
Prefixes g and q, in front of primer names, indicate use in genomic PCR or qRT-PCR
* see Materials and Methods for qRT-PCR reaction conditions
